# Supplementary material for: Impact of Infliximab Biosimilar CT-P13 Dose and Infusion Interval on Real-World Drug Survival and Effectiveness in Patients with Ankylosing Spondylitis
Source: MDPI journal article supplement (doi:10.3390/jcm10194568), 2021-10-01
Supplement: s1 [file s1]

## **Supplementary materials**

### **Impact of infliximab biosimilar CT-P13 dose and infusion interval on real-world drug survival and effectiveness in patients with ankylosing spondylitis**

Shin-Seok Lee, Tae-Hwan Kim, Won Park, Yeong-Wook Song, Chang-Hee Suh, Soo-Kyoung Kim and Dae-Hyun Yoo

Correspondence to:

Professor Dae-Hyun Yoo

Department of Rheumatology, Hanyang University Hospital for Rheumatic Diseases, 222-1 Wangsimni-ro, Seongdong-gu, Seoul 04763, Republic of Korea and Hanyang University Institute for Rheumatology Research, 222-1 Wangsimni-ro, Seongdong-gu, Seoul 04763, Republic of Korea

Email: dhyoo@hanyang.ac.kr

**Table S1.** Baseline demographics and disease characteristics by baseline dose group (naïve patients).

|                                               | Overall<br>( <i>n</i> = 175 <sup>1</sup> ) | Baseline dose                |                                 |                              | <i>p</i> -value <sup>2</sup> |
|-----------------------------------------------|--------------------------------------------|------------------------------|---------------------------------|------------------------------|------------------------------|
|                                               |                                            | <4 mg/kg<br>( <i>n</i> = 42) | ≥4–<5 mg/kg<br>( <i>n</i> = 84) | ≥5 mg/kg<br>( <i>n</i> = 49) |                              |
| Sex, <i>n</i> (%)                             |                                            |                              |                                 |                              |                              |
| Female                                        | 48 (27.4)                                  | 14 (33.3)                    | 18 (21.4)                       | 16 (32.7)                    | 0.2315 <sup>3</sup>          |
| Male                                          | 127 (72.6)                                 | 28 (66.7)                    | 66 (78.6)                       | 33 (67.3)                    |                              |
| Median (IQR)<br>treatment<br>duration, months | 20.3<br>(7.40–35.2)                        | 15.2<br>(5.77–28.5)          | 22.5<br>(7.80–35.1)             | 24.2<br>(5.30–44.4)          | 0.5398                       |
| Median (IQR)<br>disease duration,<br>years    | 1 (0–5)                                    | 2 (0–5)                      | 1 (0–5)                         | 1 (1–4)                      | 0.6058                       |
| Median (IQR) age,<br>years                    | 36 (28–49)                                 | 42 (30–52)                   | 33 (26–44)                      | 38 (32–50)                   | 0.0481                       |
| Body weight, kg                               |                                            |                              |                                 |                              |                              |
| <i>n</i>                                      | 169                                        | 39                           | 83                              | 47                           | 0.0527                       |
| Median (IQR)                                  | 67.0<br>(60.0–75.0)                        | 73.0<br>(58.0–80.0)          | 68.0<br>(62.0–73.0)             | 60.0<br>(58.0–76.0)          |                              |
| BMI, kg/m <sup>2</sup>                        |                                            |                              |                                 |                              |                              |
| <i>n</i>                                      | 134                                        | 35                           | 56                              | 43                           | 0.1699                       |
| Median (IQR)                                  | 23.06<br>(21.05–25.88)                     | 24.22<br>(22.44–27.15)       | 22.78<br>(21.08–24.00)          | 22.94<br>(20.70–26.16)       |                              |
| BASDAI score                                  |                                            |                              |                                 |                              |                              |
| <i>n</i>                                      | 140                                        | 30                           | 67                              | 43                           | 0.0781                       |
| Median (IQR)                                  | 7.48<br>(6.55–8.33)                        | 7.00<br>(6.09–8.00)          | 7.50<br>(6.80–8.30)             | 7.64<br>(6.50–9.10)          |                              |
| ESR, mm/h                                     |                                            |                              |                                 |                              |                              |
| <i>n</i>                                      | 168                                        | 40                           | 82                              | 46                           | 0.2982                       |
| Median (IQR)                                  | 34 (14–65)                                 | 43 (18–67)                   | 35 (18–70)                      | 31 (9–51)                    |                              |
| CRP, mg/L                                     |                                            |                              |                                 |                              |                              |
| <i>n</i>                                      | 168                                        | 40                           | 82                              | 46                           | 0.2212                       |
| Median (IQR)                                  | 1.39<br>(0.62–3.75)                        | 2.03<br>(0.74–3.23)          | 1.36<br>(0.68–4.44)             | 1.17<br>(0.32–3.20)          |                              |

<sup>1</sup> Baseline dose was missing for 44 patients because of missing weight information (*n* = 34) or missing dose after induction period in naïve patients (*n* = 10). <sup>2</sup> *p*-values were determined by Kruskal–Wallis test, unless otherwise specified. <sup>3</sup> *p*-value was determined by chi-squared test. BASDAI, Bath Ankylosing Spondylitis Disease Activity Index; BMI, body mass index; CRP, C-reactive protein; ESR, erythrocyte sedimentation rate; IQR, interquartile range.

**Table S2.** Baseline demographics and disease characteristics by baseline dose group (switched patients).

|                                               | Overall<br>( <i>n</i> = 95 <sup>1</sup> ) | Baseline dose                |                                 |                              | <i>p</i> -value <sup>2</sup> |
|-----------------------------------------------|-------------------------------------------|------------------------------|---------------------------------|------------------------------|------------------------------|
|                                               |                                           | <4 mg/kg<br>( <i>n</i> = 29) | ≥4–<5 mg/kg<br>( <i>n</i> = 33) | ≥5 mg/kg<br>( <i>n</i> = 33) |                              |
| Sex, <i>n</i> (%)                             |                                           |                              |                                 |                              |                              |
| Female                                        | 20 (21.1)                                 | 6 (20.7)                     | 6 (18.2)                        | 8 (24.2)                     | 0.8320 <sup>3</sup>          |
| Male                                          | 75 (78.9)                                 | 23 (79.3)                    | 27 (81.8)                       | 25 (75.8)                    |                              |
| Median (IQR)<br>treatment duration,<br>months | 31.0<br>(9.80–49.4)                       | 42.1<br>(17.7–49.2)          | 25.6<br>(7.47–48.3)             | 31.0<br>(7.50–51.9)          | 0.6165                       |
| Median (IQR)<br>disease duration,<br>years    | 5 (2–9)                                   | 5 (4–8)                      | 7 (3–9)                         | 5 (2–7)                      | 0.5453                       |
| Median (IQR) age,<br>years                    | 40 (31–52)                                | 45 (38–56)                   | 34 (30–43)                      | 42 (33–52)                   | 0.0287                       |
| Body weight, kg                               |                                           |                              |                                 |                              |                              |
| <i>n</i>                                      | 95                                        | 29                           | 33                              | 33                           | 0.7345 <sup>4</sup>          |
| Median (IQR)                                  | 66.7<br>(59.0–73.0)                       | 64.0<br>(58.1–77.0)          | 67.2<br>(61.8–72.0)             | 65.9<br>(56.8–73.0)          |                              |
| BMI, kg/m <sup>2</sup>                        |                                           |                              |                                 |                              |                              |
| <i>n</i>                                      | 89                                        | 28                           | 29                              | 32                           | 0.5634 <sup>4</sup>          |
| Median (IQR)                                  | 23.53<br>(21.87–25.35)                    | 23.80<br>(22.73–25.37)       | 23.45<br>(21.13–25.86)          | 23.10<br>(20.61–25.02)       |                              |
| BASDAI score                                  |                                           |                              |                                 |                              |                              |
| <i>n</i>                                      | 72                                        | 25                           | 21                              | 26                           | <0.0001                      |
| Median (IQR)                                  | 1.91<br>(0.58–4.08)                       | 0.57<br>(0.30–1.66)          | 1.01<br>(0.66–2.80)             | 4.24<br>(2.86–5.10)          |                              |
| ESR, mm/h                                     |                                           |                              |                                 |                              |                              |
| <i>n</i>                                      | 91                                        | 29                           | 31                              | 31                           | 0.1431                       |
| Median (IQR)                                  | 8 (5–19)                                  | 13 (5–42)                    | 8 (5–16)                        | 6 (4–17)                     |                              |
| CRP, mg/L                                     |                                           |                              |                                 |                              |                              |
| <i>n</i>                                      | 91                                        | 29                           | 31                              | 31                           | 0.6867                       |
| Median (IQR)                                  | 0.14<br>(0.05–0.80)                       | 0.27<br>(0.05–0.80)          | 0.24<br>(0.04–0.80)             | 0.10<br>(0.05–0.43)          |                              |

<sup>1</sup> Baseline dose was missing for 23 patients because of missing weight information. <sup>2</sup> *p*-values were determined by Kruskal–Wallis test, unless otherwise specified. <sup>3</sup> *p*-value was determined by chi-squared test. <sup>4</sup> *p*-value was determined by one-way analysis of variance. BASDAI, Bath Ankylosing Spondylitis Disease Activity Index; BMI, body mass index; CRP, C-reactive protein; ESR, erythrocyte sedimentation rate; IQR, interquartile range.

**Table S3.** Baseline demographics and disease characteristics by dose analysis group (overall).

|                                               | Overall<br>( <i>n</i> = 235 <sup>1</sup> ) | Dose analysis group                |                                       |                                      | <i>p</i> -value <sup>2</sup> |
|-----------------------------------------------|--------------------------------------------|------------------------------------|---------------------------------------|--------------------------------------|------------------------------|
|                                               |                                            | Constant dose<br>( <i>n</i> = 217) | Increased<br>dose<br>( <i>n</i> = 12) | Decreased<br>dose<br>( <i>n</i> = 6) |                              |
| Sex, <i>n</i> (%)                             |                                            |                                    |                                       |                                      |                              |
| Female                                        | 57 (24.3)                                  | 167 (77.0)                         | 6 (50.0)                              | 5 (83.3)                             | 0.1158 <sup>3</sup>          |
| Male                                          | 178 (75.7)                                 | 50 (23.0)                          | 6 (50.0)                              | 1 (16.7)                             |                              |
| Median (IQR)<br>treatment duration,<br>months | 27.7<br>(12.6–47.8)                        | 26.4<br>(12.5–47.8)                | 43.7<br>(19.8–49.6)                   | 33.5<br>(32.6–44.4)                  | 0.4002                       |
| Median (IQR)<br>disease duration,<br>years    | 3 (1–7)                                    | 3 (1–7)                            | 2 (1–6)                               | 3 (1–5)                              | 0.9088                       |
| Median (IQR) age,<br>years                    | 38 (29–50)                                 | 36 (29–50)                         | 47 (33–62)                            | 37 (26–63)                           | 0.2623                       |
| Baseline dose group, <i>n</i> (%)             |                                            |                                    |                                       |                                      |                              |
| <i>n</i>                                      | 235                                        | 217                                | 12                                    | 6                                    | N/C                          |
| <4 mg/kg                                      | 59 (25.1)                                  | 50 (23.0)                          | 9 (75.0)                              | 0                                    |                              |
| ≥4-<5 mg/kg                                   | 101 (43.0)                                 | 96 (44.2)                          | 3 (25.0)                              | 2 (33.3)                             |                              |
| ≥5 mg/kg                                      | 75 (31.9)                                  | 71 (32.7)                          | 0                                     | 4 (66.7)                             |                              |
| Body weight, kg                               |                                            |                                    |                                       |                                      |                              |
| <i>n</i>                                      | 231                                        | 213                                | 12                                    | 6                                    | 0.4311                       |
| Median (IQR)                                  | 66.7<br>(59–74)                            | 66.9<br>(60–75)                    | 63.0<br>(58–68)                       | 70.1<br>(60–73)                      |                              |
| BMI, kg/m <sup>2</sup>                        |                                            |                                    |                                       |                                      |                              |
| <i>n</i>                                      | 190                                        | 172                                | 12                                    | 6                                    | 0.6893                       |
| Median (IQR)                                  | 23.44<br>(21.63–25.48)                     | 23.41<br>(21.35–25.52)             | 23.71<br>(23.02–25.18)                | 22.76<br>(20.82–26.13)               |                              |
| BASDAI score                                  |                                            |                                    |                                       |                                      |                              |
| <i>n</i>                                      | 187                                        | 172                                | 10                                    | 5                                    | 0.1175                       |
| Median (IQR)                                  | 6.70<br>(3.83–7.90)                        | 6.75<br>(3.83–8.00)                | 4.84<br>(0.50–6.50)                   | 6.50<br>(6.20–6.71)                  |                              |
| ESR, mm/h                                     |                                            |                                    |                                       |                                      |                              |
| <i>n</i>                                      | 225                                        | 208                                | 12                                    | 5                                    | 0.0276                       |
| Median (IQR)                                  | 21 (7–50)                                  | 20 (7–48)                          | 24 (12–64)                            | 78 (50–78)                           |                              |
| CRP, mg/L                                     |                                            |                                    |                                       |                                      |                              |
| <i>n</i>                                      | 225                                        | 208                                | 12                                    | 5                                    | 0.1533                       |
| Median (IQR)                                  | 0.80<br>(0.22–2.64)                        | 0.80<br>(0.16–2.54)                | 0.84<br>(0.30–2.57)                   | 4.45<br>(1.60–5.46)                  |                              |

<sup>1</sup>Dose was missing for 102 patients because of missing weight information or not meeting the minimum number of infusions for dose change analysis. <sup>2</sup>*p*-values were determined by Kruskal–Wallis test, unless otherwise specified. <sup>3</sup>*p*-value was determined by Fisher’s exact test. BASDAI, Bath Ankylosing Spondylitis Disease Activity Index; BMI, body mass index; CRP, C-reactive protein; ESR, erythrocyte sedimentation rate; IQR, interquartile range; N/C, not calculable.

**Table S4.** Baseline demographics and disease characteristics by dose analysis group (naïve patients).

|                                               | Overall<br>( <i>n</i> = 152 <sup>1</sup> ) | Dose analysis group                |                                      |                                      | <i>p</i> -value <sup>2</sup> |
|-----------------------------------------------|--------------------------------------------|------------------------------------|--------------------------------------|--------------------------------------|------------------------------|
|                                               |                                            | Constant dose<br>( <i>n</i> = 142) | Increased<br>dose<br>( <i>n</i> = 5) | Decreased<br>dose<br>( <i>n</i> = 5) |                              |
| Sex, <i>n</i> (%)                             |                                            |                                    |                                      |                                      |                              |
| Female                                        | 42 (27.6)                                  | 38 (26.8)                          | 2 (40.0)                             | 4 (80.0)                             | 0.2792 <sup>3</sup>          |
| Male                                          | 110 (72.4)                                 | 104 (73.2)                         | 3 (60.0)                             | 1 (20.0)                             |                              |
| Median (IQR)<br>treatment duration,<br>months | 25.0<br>(11.5–37.0)                        | 24.4<br>(11.5–36.9)                | 13.1<br>(9.97–26.6)                  | 33.6<br>(33.4–44.4)                  | 0.0981                       |
| Median (IQR)<br>disease duration,<br>years    | 1 (0–5)                                    | 1 (0–5)                            | 1 (0–1)                              | 2 (1–3)                              | 0.4048                       |
| Median (IQR) age,<br>years                    | 34 (27–49)                                 | 34 (27–48)                         | 47 (27–61)                           | 32 (26–63)                           | 0.6740                       |
| Baseline dose group, <i>n</i> (%)             |                                            |                                    |                                      |                                      |                              |
| <i>n</i>                                      | 152                                        | 142                                | 5                                    | 5                                    | N/C                          |
| <4 mg/kg                                      | 33 (21.7)                                  | 30 (21.1)                          | 3 (60.0)                             | 0                                    |                              |
| ≥4-<5 mg/kg                                   | 74 (48.7)                                  | 71 (50.0)                          | 2 (40.0)                             | 1 (20.0)                             |                              |
| ≥5 mg/kg                                      | 45 (29.6)                                  | 41 (28.9)                          | 0                                    | 4 (80.0)                             |                              |
| Body weight, kg                               |                                            |                                    |                                      |                                      |                              |
| <i>n</i>                                      | 148                                        | 138                                | 5                                    | 5                                    | 0.5256                       |
| Median (IQR)                                  | 67.1<br>(59.3–75.0)                        | 67.1<br>(60.0–75.0)                | 60.0<br>(54.0–68.0)                  | 68.2<br>(60.0–73.0)                  |                              |
| BMI, kg/m <sup>2</sup>                        |                                            |                                    |                                      |                                      |                              |
| <i>n</i>                                      | 113                                        | 103                                | 5                                    | 5                                    | 0.8332                       |
| Median (IQR)                                  | 23.26<br>(21.10–25.70)                     | 23.36<br>(21.10–25.88)             | 23.62<br>(22.99–23.68)               | 22.58<br>(20.82–22.94)               |                              |
| BASDAI score                                  |                                            |                                    |                                      |                                      |                              |
| <i>n</i>                                      | 124                                        | 115                                | 4                                    | 5                                    | 0.0529                       |
| Median (IQR)                                  | 7.48<br>(6.55–8.40)                        | 7.60<br>(6.60–8.50)                | 6.13<br>(5.61–7.43)                  | 6.50<br>(6.20–6.71)                  |                              |
| ESR, mm/h                                     |                                            |                                    |                                      |                                      |                              |
| <i>n</i>                                      | 145                                        | 135                                | 5                                    | 5                                    | 0.1076                       |
| Median (IQR)                                  | 33 (13–67)                                 | 32 (12–60)                         | 25 (18–73)                           | 78 (50–78)                           |                              |
| CRP, mg/L                                     |                                            |                                    |                                      |                                      |                              |
| <i>n</i>                                      | 145                                        | 135                                | 5                                    | 5                                    | 0.4775                       |
| Median (IQR)                                  | 1.40<br>(0.63–3.70)                        | 1.39<br>(0.62–3.60)                | 2.86<br>(0.87–3.06)                  | 4.45<br>(1.60–5.46)                  |                              |

<sup>1</sup>Dose was missing for 67 patients because of missing weight information or not meeting the minimum number of infusions for dose change analysis. <sup>2</sup>*p*-values were determined by Kruskal–Wallis test, unless otherwise specified. <sup>3</sup>*p*-value was determined by Fisher’s exact test. BASDAI, Bath Ankylosing Spondylitis Disease Activity Index; BMI, body mass index; CRP, C-reactive protein; ESR, erythrocyte sedimentation rate; IQR, interquartile range; N/C, not calculable.

**Table S5.** Baseline demographics and disease characteristics by dose analysis group (switched patients).

|                                               | Overall<br>( <i>n</i> = 83 <sup>1</sup> ) | Dose analysis group               |                                      |                                      | <i>p</i> -value <sup>2</sup> |
|-----------------------------------------------|-------------------------------------------|-----------------------------------|--------------------------------------|--------------------------------------|------------------------------|
|                                               |                                           | Constant dose<br>( <i>n</i> = 75) | Increased<br>dose<br>( <i>n</i> = 7) | Decreased<br>dose<br>( <i>n</i> = 1) |                              |
| Sex, <i>n</i> (%)                             |                                           |                                   |                                      |                                      |                              |
| Female                                        | 15 (18.1)                                 | 12 (16.0)                         | 3 (42.9)                             | 0                                    | 0.2715 <sup>3</sup>          |
| Male                                          | 68 (81.9)                                 | 63 (84.0)                         | 4 (57.1)                             | 1 (100.0)                            |                              |
| Median (IQR)<br>treatment duration,<br>months | 39.2<br>(16.7–50.2)                       | 36.6<br>(16.6–50.7)               | 49.2<br>(42.1–50.2)                  | 5.77<br>(N/C)                        | 0.1258                       |
| Median (IQR) disease<br>duration, years       | 6 (3–9)                                   | 6 (3–9)                           | 5 (2–11)                             | 15 (N/C)                             | 0.2452                       |
| Median (IQR) age,<br>years                    | 41 (32–53)                                | 40 (32–53)                        | 46 (39–63)                           | 41 (N/C)                             | 0.5857                       |
| Baseline dose group, <i>n</i> (%)             |                                           |                                   |                                      |                                      |                              |
| <i>n</i>                                      | 83                                        | 75                                | 7                                    | 1                                    |                              |
| <4 mg/kg                                      | 26 (31.3)                                 | 20 (26.7)                         | 6 (85.7)                             | 0                                    | N/C                          |
| ≥4–<5 mg/kg                                   | 27 (32.5)                                 | 25 (33.3)                         | 1 (14.3)                             | 1 (100.0)                            |                              |
| ≥5 mg/kg                                      | 30 (36.1)                                 | 30 (40.0)                         | 0                                    | 0                                    |                              |
| Body weight, kg                               |                                           |                                   |                                      |                                      |                              |
| <i>n</i>                                      | 83                                        | 75                                | 7                                    | 1                                    |                              |
| Median (IQR)                                  | 66.0<br>(59.0–73.0)                       | 66.0<br>(59.0–73.0)               | 64.0<br>(58.1–67.2)                  | 72.0<br>(N/C)                        | 0.6631                       |
| BMI, kg/m <sup>2</sup>                        |                                           |                                   |                                      |                                      |                              |
| <i>n</i>                                      | 77                                        | 69                                | 7                                    | 1                                    |                              |
| Median (IQR)                                  | 23.53<br>(21.94–25.35)                    | 23.45<br>(21.64–25.15)            | 24.89<br>(23.05–28.20)               | 26.13 (N/C)                          | 0.1925                       |
| BASDAI score                                  |                                           |                                   |                                      |                                      |                              |
| <i>n</i>                                      | 63                                        | 57                                | 6                                    | 0                                    |                              |
| Median (IQR)                                  | 1.87<br>(0.51–3.88)                       | 1.94<br>(0.62–3.83)               | 1.08<br>(0.30–4.20)                  | N/C                                  | 0.5504 <sup>4</sup>          |
| ESR, mm/h                                     |                                           |                                   |                                      |                                      |                              |
| <i>n</i>                                      | 80                                        | 73                                | 7                                    | 0                                    |                              |
| Median (IQR)                                  | 8 (5–21)                                  | 8 (5–18)                          | 22 (8–59)                            | N/C                                  | 0.1046 <sup>4</sup>          |
| CRP, mg/L                                     |                                           |                                   |                                      |                                      |                              |
| <i>n</i>                                      | 80                                        | 73                                | 7                                    | 0                                    |                              |
| Median (IQR)                                  | 0.21<br>(0.05–0.80)                       | 0.14<br>(0.05–0.80)               | 0.80<br>(0.20–1.76)                  | N/C                                  | 0.0944 <sup>4</sup>          |

<sup>1</sup>Dose was missing for 35 patients because of missing weight information or not meeting the minimum number of infusions for dose change analysis. <sup>2</sup>*p*-values were determined by Kruskal–Wallis test, unless otherwise specified. <sup>3</sup>*p*-value was determined by Fisher’s exact test. <sup>4</sup>*p*-value was determined by two-sided Wilcoxon’s rank sum test using a normal approximation. BASDAI, Bath Ankylosing Spondylitis Disease Activity Index; BMI, body mass index; CRP, C-reactive protein; ESR, erythrocyte sedimentation rate; IQR, interquartile range; N/C, not calculable.

**Table S6.** Median (IQR) numbers of annual infusions overall and for naïve and switched patients.

|              | <b>Year 1</b>    | <b>Year 2</b>    | <b>Year 3</b>    | <b>Year 4</b>    | <b>Year 5</b>    |
|--------------|------------------|------------------|------------------|------------------|------------------|
| Overall      |                  |                  |                  |                  |                  |
| <i>n</i>     | 327              | 216              | 155              | 100              | 64               |
| Median (IQR) | 6.0<br>(5.0–7.0) | 6.0<br>(4.0–6.0) | 6.0<br>(4.0–6.0) | 6.0<br>(5.0–6.0) | 2.0<br>(1.0–3.0) |
| Naïve        |                  |                  |                  |                  |                  |
| <i>n</i>     | 209              | 132              | 89               | 44               | 24               |
| Median (IQR) | 7.0<br>(5.0–7.0) | 6.0<br>(4.0–6.5) | 5.0<br>(3.0–6.0) | 6.0<br>(4.0–7.0) | 2.0<br>(2.0–3.0) |
| Switched     |                  |                  |                  |                  |                  |
| <i>n</i>     | 118              | 84               | 66               | 56               | 40               |
| Median (IQR) | 6.0<br>(5.0–7.0) | 6.0<br>(5.0–6.0) | 6.0<br>(4.0–6.0) | 6.0<br>(5.0–6.0) | 1.0<br>(1.0–2.5) |

IQR, interquartile range.

**Table S7.** Baseline demographics and disease characteristics by interval analysis group (overall).

|                                               | Overall<br>( <i>n</i> = 224 <sup>1</sup> ) | Interval analysis group                   |                                           |                                           | <i>p</i> -value <sup>2</sup> |
|-----------------------------------------------|--------------------------------------------|-------------------------------------------|-------------------------------------------|-------------------------------------------|------------------------------|
|                                               |                                            | Constant<br>interval<br>( <i>n</i> = 114) | Increased<br>interval<br>( <i>n</i> = 79) | Decreased<br>interval<br>( <i>n</i> = 31) |                              |
| Sex, <i>n</i> (%)                             |                                            |                                           |                                           |                                           |                              |
| Female                                        | 53 (23.7)                                  | 26 (22.8)                                 | 19 (24.1)                                 | 8 (25.8)                                  | 0.9363 <sup>3</sup>          |
| Male                                          | 171 (76.3)                                 | 88 (77.2)                                 | 60 (75.9)                                 | 23 (74.2)                                 |                              |
| Median (IQR)<br>treatment duration,<br>months | 33.4<br>(21.5–49.4)                        | 32.7<br>(17.0–50.1)                       | 33.4<br>(25.0–47.8)                       | 35.3<br>(21.5–50.9)                       | 0.9108                       |
| Median (IQR)<br>disease duration,<br>years    | 3 (1–7)                                    | 3 (1–8)                                   | 2 (1–5)                                   | 5 (1–7)                                   | 0.0420                       |
| Median (IQR) age,<br>years                    | 38 (30–49)                                 | 40 (32–49)                                | 33 (27–49)                                | 40 (29–49)                                | 0.1715                       |
| Baseline dose group, <i>n</i> (%)             |                                            |                                           |                                           |                                           |                              |
| <i>n</i>                                      | 186                                        | 94                                        | 63                                        | 29                                        |                              |
| <4 mg/kg                                      | 52 (28.0)                                  | 26 (27.7)                                 | 19 (30.2)                                 | 7 (24.1)                                  | 0.2032 <sup>3</sup>          |
| ≥4–<5 mg/kg                                   | 80 (43.0)                                  | 34 (36.2)                                 | 30 (47.6)                                 | 16 (55.2)                                 |                              |
| ≥5 mg/kg                                      | 54 (29.0)                                  | 34 (36.2)                                 | 14 (22.2)                                 | 6 (20.7)                                  |                              |
| Body weight, kg                               |                                            |                                           |                                           |                                           |                              |
| <i>n</i>                                      | 183                                        | 94                                        | 60                                        | 29                                        |                              |
| Median (IQR)                                  | 67.0<br>(60.0–74.0)                        | 67.1<br>(60.0–75.0)                       | 68.0<br>(60.0–73.0)                       | 63.4<br>(58.2–73.0)                       | 0.7172 <sup>4</sup>          |
| BMI, kg/m <sup>2</sup>                        |                                            |                                           |                                           |                                           |                              |
| <i>n</i>                                      | 144                                        | 81                                        | 41                                        | 22                                        |                              |
| Median (IQR)                                  | 23.50<br>(21.68–25.33)                     | 23.67<br>(21.83–26.57)                    | 23.38<br>(21.72–24.89)                    | 22.93<br>(21.41–24.22)                    | 0.1625 <sup>4</sup>          |
| BASDAI score                                  |                                            |                                           |                                           |                                           |                              |
| <i>n</i>                                      | 186                                        | 96                                        | 67                                        | 23                                        |                              |
| Median (IQR)                                  | 6.50<br>(2.20–7.70)                        | 6.15<br>(1.95–7.76)                       | 6.71<br>(4.50–7.90)                       | 5.47<br>(0.98–7.30)                       | 0.1755                       |
| ESR, mm/h                                     |                                            |                                           |                                           |                                           |                              |
| <i>n</i>                                      | 218                                        | 110                                       | 77                                        | 31                                        |                              |
| Median (IQR)                                  | 23 (8–51)                                  | 21 (7–48)                                 | 30 (13–51)                                | 18 (7–68)                                 | 0.1372                       |
| CRP, mg/L                                     |                                            |                                           |                                           |                                           |                              |
| <i>n</i>                                      | 218                                        | 110                                       | 77                                        | 31                                        |                              |
| Median (IQR)                                  | 0.80<br>(0.24–2.50)                        | 0.80<br>(0.14–1.77)                       | 1.30<br>(0.66–3.56)                       | 0.59<br>(0.11–3.13)                       | 0.0137                       |

<sup>1</sup> Interval was missing for 113 patients because of a missing infusion date record or not meeting the minimum number of infusions for interval change analysis. <sup>2</sup> *p*-values were determined by Kruskal–Wallis test, unless otherwise specified. <sup>3</sup> *p*-value was determined by chi-squared test. <sup>4</sup> *p*-value was determined by one-way analysis of variance. BASDAI, Bath Ankylosing Spondylitis Disease Activity Index; BMI, body mass index; CRP, C-reactive protein; ESR, erythrocyte sedimentation rate; IQR, interquartile range.



**Table S8.** Baseline demographics and disease characteristics by interval analysis group (naïve patients).

|                                               | Overall<br>( <i>n</i> = 140 <sup>1</sup> ) | Interval analysis group                  |                                           |                                           | <i>p</i> -value <sup>2</sup> |
|-----------------------------------------------|--------------------------------------------|------------------------------------------|-------------------------------------------|-------------------------------------------|------------------------------|
|                                               |                                            | Constant<br>interval<br>( <i>n</i> = 61) | Increased<br>interval<br>( <i>n</i> = 63) | Decreased<br>interval<br>( <i>n</i> = 16) |                              |
| Sex, <i>n</i> (%)                             |                                            |                                          |                                           |                                           |                              |
| Female                                        | 36 (25.7)                                  | 15 (24.6)                                | 16 (25.4)                                 | 5 (31.3)                                  | 0.8606 <sup>3</sup>          |
| Male                                          | 104 (74.3)                                 | 46 (75.4)                                | 47 (74.6)                                 | 11 (68.8)                                 |                              |
| Median (IQR)<br>treatment duration,<br>months | 29.2<br>(17.3–41.9)                        | 25.4<br>(14.9–43.5)                      | 32.4<br>(24.3–37.0)                       | 35.3<br>(20.1–52.0)                       | 0.0938                       |
| Median (IQR)<br>disease duration,<br>years    | 1 (0–5)                                    | 1 (0–5)                                  | 1 (0–5)                                   | 2 (1–4)                                   | 0.9988                       |
| Median (IQR) age,<br>years                    | 34 (28–48)                                 | 35 (28–47)                               | 32 (27–47)                                | 41 (31–49)                                | 0.3183                       |
| Baseline dose group, <i>n</i> (%)             |                                            |                                          |                                           |                                           |                              |
| <i>n</i>                                      | 118                                        | 51                                       | 51                                        | 16                                        | 0.7582 <sup>4</sup>          |
| <4 mg/kg                                      | 29 (24.6)                                  | 12 (23.5)                                | 12 (23.5)                                 | 5 (31.3)                                  |                              |
| ≥4 <5 mg/kg                                   | 56 (47.5)                                  | 22 (43.1)                                | 27 (52.9)                                 | 7 (43.8)                                  |                              |
| ≥5 mg/kg                                      | 33 (28.0)                                  | 17 (33.3)                                | 12 (23.5)                                 | 4 (25.0)                                  |                              |
| Body weight, kg                               |                                            |                                          |                                           |                                           |                              |
| <i>n</i>                                      | 115                                        | 51                                       | 48                                        | 16                                        | 0.8698 <sup>5</sup>          |
| Median (IQR)                                  | 68.0<br>(60.0–75.0)                        | 70.0<br>(60.0–76.4)                      | 68.0<br>(60.0–74.5)                       | 66.3<br>(58.1–74.0)                       |                              |
| BMI, kg/m <sup>2</sup>                        |                                            |                                          |                                           |                                           |                              |
| <i>n</i>                                      | 82                                         | 43                                       | 30                                        | 9                                         | 0.3625                       |
| Median (IQR)                                  | 23.53<br>(21.29–25.71)                     | 23.73<br>(20.82–26.93)                   | 22.59<br>(21.64–25.30)                    | 22.91<br>(21.80–23.68)                    |                              |
| BASDAI score                                  |                                            |                                          |                                           |                                           |                              |
| <i>n</i>                                      | 118                                        | 53                                       | 53                                        | 12                                        | 0.2317 <sup>5</sup>          |
| Median (IQR)                                  | 7.43<br>(6.60–8.30)                        | 7.64<br>(6.70–8.89)                      | 7.40<br>(6.50–8.09)                       | 7.13<br>(6.70–7.60)                       |                              |
| ESR, mm/h                                     |                                            |                                          |                                           |                                           |                              |
| <i>n</i>                                      | 136                                        | 59                                       | 61                                        | 16                                        | 0.7535                       |
| Median (IQR)                                  | 34 (15–67)                                 | 30 (18–60)                               | 35 (15–62)                                | 44 (10–74)                                |                              |
| CRP, mg/L                                     |                                            |                                          |                                           |                                           |                              |
| <i>n</i>                                      | 136                                        | 59                                       | 61                                        | 16                                        | 0.5367                       |
| Median (IQR)                                  | 1.46<br>(0.77–3.68)                        | 1.39<br>(0.64–3.57)                      | 1.60<br>(0.80–4.00)                       | 1.87<br>(0.47–4.20)                       |                              |

<sup>1</sup> Interval was missing for 79 patients because of a missing infusion date record or not meeting the minimum number of infusions for interval change analysis. <sup>2</sup> *p*-values were determined by Kruskal–Wallis test, unless otherwise specified. <sup>3</sup> *p*-value was determined by chi-squared test. <sup>4</sup> *p*-value was determined by Fisher’s exact test. <sup>5</sup> *p*-value was determined by one-way analysis of variance. BASDAI, Bath Ankylosing Spondylitis Disease Activity Index; BMI, body mass index; CRP, C-reactive protein; ESR, erythrocyte sedimentation rate; IQR, interquartile range.

**Table S9.** Baseline demographics and disease characteristics by interval analysis group (switched patients).

|                                               | Overall<br>( <i>n</i> = 84 <sup>1</sup> ) | Interval analysis group                  |                                           |                                           | <i>p</i> -value <sup>2</sup> |
|-----------------------------------------------|-------------------------------------------|------------------------------------------|-------------------------------------------|-------------------------------------------|------------------------------|
|                                               |                                           | Constant<br>interval<br>( <i>n</i> = 53) | Increased<br>interval<br>( <i>n</i> = 16) | Decreased<br>interval<br>( <i>n</i> = 15) |                              |
| Sex, <i>n</i> (%)                             |                                           |                                          |                                           |                                           |                              |
| Female                                        | 17 (20.4)                                 | 11 (20.8)                                | 3 (18.8)                                  | 3 (20.0)                                  | 1.0000 <sup>3</sup>          |
| Male                                          | 67 (79.8)                                 | 42 (79.2)                                | 13 (81.3)                                 | 12 (80.0)                                 |                              |
| Median (IQR)<br>treatment duration,<br>months | 48.4<br>(30.1–50.6)                       | 48.9<br>(30.3–50.9)                      | 48.5<br>(33.8–49.8)                       | 47.2<br>(22.0–50.7)                       | 0.5006                       |
| Median (IQR)<br>disease duration,<br>years    | 6 (3–9)                                   | 6 (3–9)                                  | 5 (3–7)                                   | 7 (6–12)                                  | 0.0693                       |
| Median (IQR) age,<br>years                    | 41 (33–53)                                | 41 (35–52)                               | 44 (28–58)                                | 40 (29–52)                                | 0.5724 <sup>4</sup>          |
| Baseline dose group, <i>n</i> (%)             |                                           |                                          |                                           |                                           |                              |
| <i>n</i>                                      | 68                                        | 43                                       | 12                                        | 13                                        | 0.0348 <sup>3</sup>          |
| <4 mg/kg                                      | 23 (33.8)                                 | 14 (32.6)                                | 7 (58.3)                                  | 2 (15.4)                                  |                              |
| ≥4 <5 mg/kg                                   | 24 (35.3)                                 | 12 (27.9)                                | 3 (25.0)                                  | 9 (69.2)                                  |                              |
| ≥5 mg/kg                                      | 21 (30.9)                                 | 17 (39.5)                                | 2 (16.7)                                  | 2 (15.4)                                  |                              |
| Body weight, kg                               |                                           |                                          |                                           |                                           |                              |
| <i>n</i>                                      | 68                                        | 43                                       | 12                                        | 13                                        | 0.6705 <sup>4</sup>          |
| Median (IQR)                                  | 64.6<br>(59.1–71.0)                       | 65.9<br>(61.0–73.0)                      | 63.9<br>(57.3–70.0)                       | 62.6<br>(61.0–66.6)                       |                              |
| BMI, kg/m <sup>2</sup>                        |                                           |                                          |                                           |                                           |                              |
| <i>n</i>                                      | 62                                        | 38                                       | 11                                        | 13                                        | 0.7490                       |
| Median (IQR)                                  | 23.46<br>(22.01–25.21)                    | 23.33<br>(22.01–26.31)                   | 23.66<br>(22.27–24.25)                    | 22.96<br>(21.41–24.45)                    |                              |
| BASDAI score                                  |                                           |                                          |                                           |                                           |                              |
| <i>n</i>                                      | 68                                        | 43                                       | 14                                        | 11                                        | 0.0883                       |
| Median (IQR)                                  | 1.05<br>(0.33–2.89)                       | 1.66<br>(0.50–3.40)                      | 0.42<br>(0.20–1.10)                       | 0.98<br>(0.30–3.57)                       |                              |
| ESR, mm/h                                     |                                           |                                          |                                           |                                           |                              |
| <i>n</i>                                      | 82                                        | 51                                       | 16                                        | 15                                        | 0.4353                       |
| Median (IQR)                                  | 12 (5–29)                                 | 8 (5–23)                                 | 15 (7–41)                                 | 17 (5–29)                                 |                              |
| CRP, mg/L                                     |                                           |                                          |                                           |                                           |                              |
| <i>n</i>                                      | 82                                        | 51                                       | 16                                        | 15                                        | 0.7863                       |
| Median (IQR)                                  | 0.18<br>(0.05–0.80)                       | 0.20<br>(0.05–0.80)                      | 0.17<br>(0.04–0.57)                       | 0.12<br>(0.03–0.80)                       |                              |

<sup>1</sup> Interval was missing for 34 patients because of a missing infusion date record or not meeting the minimum number of infusions for interval change analysis. <sup>2</sup> *p*-values were determined by Kruskal–Wallis test, unless otherwise specified. <sup>3</sup> *p*-value was determined by chi-squared test. <sup>4</sup> *p*-value was determined by one-way analysis of variance. BASDAI, Bath Ankylosing Spondylitis Disease Activity Index; BMI, body mass index; CRP, C-reactive protein; ESR, erythrocyte sedimentation rate; IQR, interquartile range.

**Table S10.** Baseline demographics and disease characteristics by combined analysis group (overall).

|                                                | Overall<br>( <i>n</i> = 186) | Combined analysis group                  |                                          | <i>p</i> -value <sup>1</sup> |
|------------------------------------------------|------------------------------|------------------------------------------|------------------------------------------|------------------------------|
|                                                |                              | Combined<br>constant<br>( <i>n</i> = 85) | Combined<br>changed<br>( <i>n</i> = 101) |                              |
| Sex, <i>n</i> (%)                              |                              |                                          |                                          |                              |
| Female                                         | 46 (24.7)                    | 18 (21.2)                                | 28 (27.7)                                | 0.3026 <sup>2</sup>          |
| Male                                           | 140 (75.3)                   | 67 (78.8)                                | 73 (72.3)                                |                              |
| Median (min–max) treatment<br>duration, months | 33.1<br>(9.97–56.8)          | 31.4<br>(11.2–56.8)                      | 33.8<br>(9.97–54.9)                      | 0.6559                       |
| Median (min–max) disease<br>duration, years    | 3 (0–33)                     | 4 (0–14)                                 | 3 (0–33)                                 | 0.0776                       |
| Median (min–max) age, years                    | 37 (18–75)                   | 40 (19–72)                               | 34 (18–75)                               | 0.1093                       |
| Baseline dose group, <i>n</i> (%)              |                              |                                          |                                          |                              |
| <4 mg/kg                                       | 52 (28.0)                    | 21 (24.7)                                | 31 (30.7)                                | 0.1217 <sup>2</sup>          |
| ≥4–<5 mg/kg                                    | 80 (43.0)                    | 33 (38.8)                                | 47 (46.5)                                |                              |
| ≥5 mg/kg                                       | 54 (29.0)                    | 31 (36.5)                                | 23 (22.8)                                |                              |
| Body weight, kg                                |                              |                                          |                                          |                              |
| <i>n</i>                                       | 183                          | 85                                       | 98                                       | 0.7982 <sup>3</sup>          |
| Median (min–max)                               | 67.0<br>(41.0–102.0)         | 67.0<br>(41.0–102.0)                     | 66.0<br>(46.0–90.0)                      |                              |
| BMI, kg/m <sup>2</sup>                         |                              |                                          |                                          |                              |
| <i>n</i>                                       | 144                          | 72                                       | 72                                       | 0.2079 <sup>3</sup>          |
| Median (min–max)                               | 23.50<br>(16.48–32.93)       | 23.70<br>(16.48–32.93)                   | 23.32<br>(17.59–32.18)                   |                              |
| BASDAI score                                   |                              |                                          |                                          |                              |
| <i>n</i>                                       | 151                          | 68                                       | 83                                       | 0.8195                       |
| Median (min–max)                               | 6.70<br>(0.00–10.00)         | 6.37<br>(0.00–10.00)                     | 6.70<br>(0.10–10.00)                     |                              |
| ESR, mm/h                                      |                              |                                          |                                          |                              |
| <i>n</i>                                       | 180                          | 81                                       | 99                                       | 0.0122                       |
| Median (min–max)                               | 24 (0–126)                   | 20 (1–126)                               | 30 (0–124)                               |                              |
| CRP, mg/L                                      |                              |                                          |                                          |                              |
| <i>n</i>                                       | 180                          | 81                                       | 99                                       | 0.0413                       |
| Median (min–max)                               | 0.80<br>(0.01–15.00)         | 0.80<br>(0.01–14.70)                     | 1.10<br>(0.01–15.00)                     |                              |

<sup>1</sup>*p*-values were determined by Wilcoxon's rank sum test, unless otherwise specified. <sup>2</sup>*p*-value was determined by chi-squared test. <sup>3</sup>*p*-value was determined by two-sample t-test. BASDAI, Bath Ankylosing Spondylitis Disease Activity Index; BMI, body mass index; CRP, C-reactive protein; ESR, erythrocyte sedimentation rate; max, maximum; min, minimum.

**Table S11.** Baseline demographics and disease characteristics by combined analysis group (naïve patients).

|                                                | Overall<br>( <i>n</i> = 118) | Combined analysis group                  |                                         | <i>p</i> -value <sup>1</sup> |
|------------------------------------------------|------------------------------|------------------------------------------|-----------------------------------------|------------------------------|
|                                                |                              | Combined<br>constant<br>( <i>n</i> = 46) | Combined<br>changed<br>( <i>n</i> = 72) |                              |
| Sex, <i>n</i> (%)                              |                              |                                          |                                         |                              |
| Female                                         | 31 (26.3)                    | 10 (21.7)                                | 21 (29.2)                               | 0.3713 <sup>2</sup>          |
| Male                                           | 87 (73.7)                    | 36 (78.3)                                | 51 (70.8)                               |                              |
| Median (min–max) treatment<br>duration, months | 29.4<br>(9.97–54.9)          | 25.9<br>(11.4–54.2)                      | 32.6<br>(9.97–54.9)                     | 0.0945                       |
| Median (min–max) disease<br>duration, years    | 1 (0–14)                     | 2 (0–12)                                 | 1 (0–14)                                | 0.8549                       |
| Median (min–max) age, years                    | 34 (18–74)                   | 36 (21–71)                               | 33 (18–74)                              | 0.3696                       |
| Baseline dose group, <i>n</i> (%)              |                              |                                          |                                         |                              |
| <4 mg/kg                                       | 29 (24.6)                    | 10 (21.7)                                | 19 (26.4)                               | 0.8133 <sup>2</sup>          |
| ≥4–<5 mg/kg                                    | 56 (47.5)                    | 22 (47.8)                                | 34 (47.2)                               |                              |
| ≥5 mg/kg                                       | 33 (28.0)                    | 14 (30.4)                                | 19 (26.4)                               |                              |
| Body weight, kg                                |                              |                                          |                                         |                              |
| <i>n</i>                                       | 115                          | 46                                       | 69                                      | 0.7775 <sup>3</sup>          |
| Median (min–max)                               | 68.0<br>(41.0–102.0)         | 70.1<br>(41.0–102.0)                     | 68.0<br>(46.0–90.0)                     |                              |
| BMI, kg/m <sup>2</sup>                         |                              |                                          |                                         |                              |
| <i>n</i>                                       | 82                           | 38                                       | 44                                      | 0.1603 <sup>3</sup>          |
| Median (min–max)                               | 23.53<br>(17.51–32.93)       | 23.89<br>(17.51–32.93)                   | 22.92<br>(17.59–32.18)                  |                              |
| BASDAI score                                   |                              |                                          |                                         |                              |
| <i>n</i>                                       | 99                           | 39                                       | 60                                      | 0.0228 <sup>3</sup>          |
| Median (min–max)                               | 7.50<br>(4.10–10.00)         | 7.80<br>(4.10–10.00)                     | 7.30<br>(4.11–10.00)                    |                              |
| ESR, mm/h                                      |                              |                                          |                                         |                              |
| <i>n</i>                                       | 114                          | 44                                       | 70                                      | 0.1852                       |
| Median (min–max)                               | 35 (2–126)                   | 30 (2–126)                               | 43 (2–124)                              |                              |
| CRP, mg/L                                      |                              |                                          |                                         |                              |
| <i>n</i>                                       | 114                          | 44                                       | 70                                      | 0.1713                       |
| Median (min–max)                               | 1.46<br>(0.01–15.00)         | 1.33<br>(0.03–14.70)                     | 1.61<br>(0.01–15.00)                    |                              |

<sup>1</sup>*p*-values were determined by Wilcoxon's rank sum test, unless otherwise specified. <sup>2</sup>*p*-value was determined by chi-squared test. <sup>3</sup>*p*-value was determined by two-sample t-test. BASDAI, Bath Ankylosing Spondylitis Disease Activity Index; BMI, body mass index; CRP, C-reactive protein; ESR, erythrocyte sedimentation rate; max, maximum; min, minimum.

**Table S12.** Baseline demographics and disease characteristics by combined analysis group (switched patients).

|                                                | Overall<br>( <i>n</i> = 68) | Combined analysis group                  |                                         | <i>p</i> -value <sup>1</sup> |
|------------------------------------------------|-----------------------------|------------------------------------------|-----------------------------------------|------------------------------|
|                                                |                             | Combined<br>constant<br>( <i>n</i> = 39) | Combined<br>changed<br>( <i>n</i> = 29) |                              |
| Sex, <i>n</i> (%)                              |                             |                                          |                                         |                              |
| Female                                         | 15 (22.1)                   | 8 (20.5)                                 | 7 (24.1)                                | 0.7214 <sup>2</sup>          |
| Male                                           | 53 (77.9)                   | 31 (79.5)                                | 22 (75.9)                               |                              |
| Median (min–max) treatment<br>duration, months | 48.0<br>(11.2–56.8)         | 48.3<br>(11.2–56.8)                      | 47.8<br>(12.4–52.6)                     | 0.6553                       |
| Median (min–max) disease<br>duration, years    | 6 (0–33)                    | 7 (1–14)                                 | 6 (0–33)                                | 0.5839                       |
| Median (min–max) age, years                    | 41 (19–75)                  | 40 (19–72)                               | 43 (21–75)                              | 0.7482 <sup>3</sup>          |
| Baseline dose group, <i>n</i> (%)              |                             |                                          |                                         |                              |
| <4 mg/kg                                       | 23 (33.8)                   | 11 (28.2)                                | 12 (41.4)                               | 0.0312 <sup>2</sup>          |
| ≥4–<5 mg/kg                                    | 24 (35.3)                   | 11 (28.2)                                | 13 (44.8)                               |                              |
| ≥5 mg/kg                                       | 21 (30.9)                   | 17 (43.6)                                | 4 (13.8)                                |                              |
| Body weight, kg                                |                             |                                          |                                         |                              |
| <i>n</i>                                       | 68                          | 39                                       | 29                                      |                              |
| Median (min–max)                               | 64.6<br>(41.5–93.6)         | 65.9<br>(41.5–93.6)                      | 63.4<br>(46–90)                         | 0.5223 <sup>3</sup>          |
| BMI, kg/m <sup>2</sup>                         |                             |                                          |                                         |                              |
| <i>n</i>                                       | 62                          | 34                                       | 28                                      |                              |
| Median (min–max)                               | 23.46<br>(16.48–31.20)      | 23.33<br>(16.48–31.20)                   | 23.56<br>(17.97–30.68)                  | 0.7550 <sup>3</sup>          |
| BASDAI score                                   |                             |                                          |                                         |                              |
| <i>n</i>                                       | 52                          | 29                                       | 23                                      |                              |
| Median (min–max)                               | 1.66<br>(0.00–9.16)         | 2.27<br>(0.00–9.16)                      | 0.86<br>(0.10–7.00)                     | 0.0753                       |
| ESR, mm/h                                      |                             |                                          |                                         |                              |
| <i>n</i>                                       | 66                          | 37                                       | 29                                      |                              |
| Median (min–max)                               | 9 (0–90)                    | 6 (1–90)                                 | 15 (0–80)                               | 0.0811                       |
| CRP, mg/L                                      |                             |                                          |                                         |                              |
| <i>n</i>                                       | 66                          | 37                                       | 29                                      |                              |
| Median (min–max)                               | 0.21<br>(0.01–4.69)         | 0.29<br>(0.01–1.93)                      | 0.20<br>(0.01–4.69)                     | 0.5125                       |

<sup>1</sup>*p*-values were determined by Wilcoxon's rank sum test, unless otherwise specified. <sup>2</sup>*p*-value was determined by chi-squared test. <sup>3</sup>*p*-value was determined by two-sample t-test. BASDAI, Bath Ankylosing Spondylitis Disease Activity Index; BMI, body mass index; CRP, C-reactive protein; ESR, erythrocyte sedimentation rate; max, maximum; min, minimum.

**Table S13.** Median (IQR) BASDAI scores<sup>1</sup> by treatment group for combined analysis groups.

|                                | <b>Week 0</b>       | <b>Week 54</b>      | <b>Week 102</b>     | <b>Week 156</b>     | <b>Week 210</b>     |
|--------------------------------|---------------------|---------------------|---------------------|---------------------|---------------------|
| <b>Combined constant group</b> |                     |                     |                     |                     |                     |
| Overall                        |                     |                     |                     |                     |                     |
| <i>n</i>                       | 72                  | 73                  | 57                  | 42                  | 31                  |
| Median (IQR)                   | 6.32<br>(2.83–8.00) | 2.60<br>(0.84–3.90) | 2.40<br>(0.80–3.50) | 2.55<br>(0.80–3.80) | 2.60<br>(0.69–3.40) |
| Naïve                          |                     |                     |                     |                     |                     |
| <i>n</i>                       | 39                  | 39                  | 26                  | 18                  | 12                  |
| Median (IQR)                   | 7.80<br>(6.80–9.30) | 2.20<br>(0.84–4.10) | 1.75<br>(1.00–3.80) | 1.90<br>(0.80–3.60) | 1.44<br>(0.58–3.20) |
| Switched                       |                     |                     |                     |                     |                     |
| <i>n</i>                       | 33                  | 34                  | 31                  | 24                  | 19                  |
| Median (IQR)                   | 2.58<br>(0.90–3.80) | 2.75<br>(0.84–3.40) | 2.50<br>(0.80–3.30) | 2.80<br>(0.72–3.90) | 2.70<br>(0.69–4.00) |
| <b>Combined changed group</b>  |                     |                     |                     |                     |                     |
| Overall                        |                     |                     |                     |                     |                     |
| <i>n</i>                       | 87                  | 85                  | 76                  | 53                  | 35                  |
| Median (IQR)                   | 6.70<br>(4.11–7.60) | 1.32<br>(0.79–2.70) | 1.19<br>(0.57–2.23) | 1.20<br>(0.44–2.00) | 1.00<br>(0.39–2.30) |
| Naïve                          |                     |                     |                     |                     |                     |
| <i>n</i>                       | 63                  | 60                  | 54                  | 34                  | 18                  |
| Median (IQR)                   | 7.30<br>(6.50–7.90) | 1.83<br>(1.00–2.80) | 1.35<br>(0.80–2.20) | 1.31<br>(0.76–2.00) | 1.35<br>(0.81–2.30) |
| Switched                       |                     |                     |                     |                     |                     |
| <i>n</i>                       | 24                  | 25                  | 22                  | 19                  | 17                  |
| Median (IQR)                   | 0.92<br>(0.27–2.85) | 0.80<br>(0.40–1.54) | 0.85<br>(0.40–2.26) | 0.70<br>(0.29–2.00) | 0.58<br>(0.18–1.55) |

<sup>1</sup>BASDAI results are not presented for week 264 as there was only one evaluable patient. BASDAI, Bath Ankylosing Spondylitis Disease Activity Index; IQR, interquartile range.
